# Supplementary material
Source: Springer Nature journal article supplement (https://www.springermedizin.de/resource/supplementary/12879_2013_2646_MOESM4_ESM.pdf/9445062)

**Astrovirus**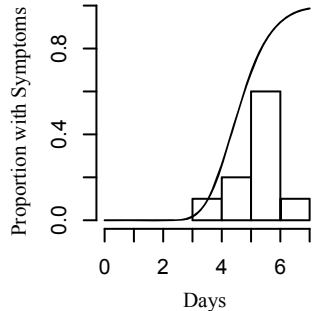**Noroviruses**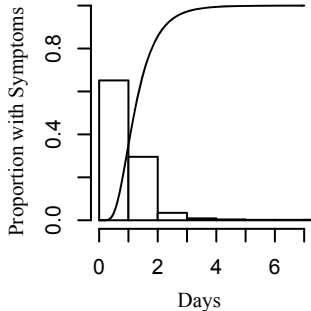**Rotavirus**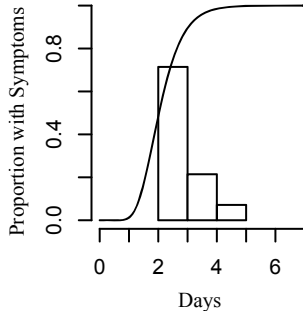**Sapoviruses**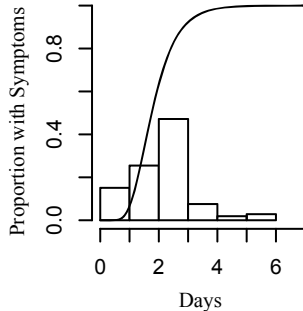

Supplement: MOESM4 [file 9445062]
